# Supplementary material for: Bioactive Phenolic Compounds from the Agroindustrial Waste of Colombian Mango Cultivars ‘Sugar Mango’ and ‘Tommy Atkins’—An Alternative for Their Use and Valorization
Source: MDPI journal article supplement (doi:10.3390/antiox8020041), 2019-02-15

Figure S3. Mass spectra of compounds detected in SKS extract by HPLC-ESI-MS(Q-TOF)  
Signal 1: 3.998 min. 3-β-Galactopyrasonyl glucose (C<sub>12</sub>H<sub>22</sub>O<sub>11</sub>)

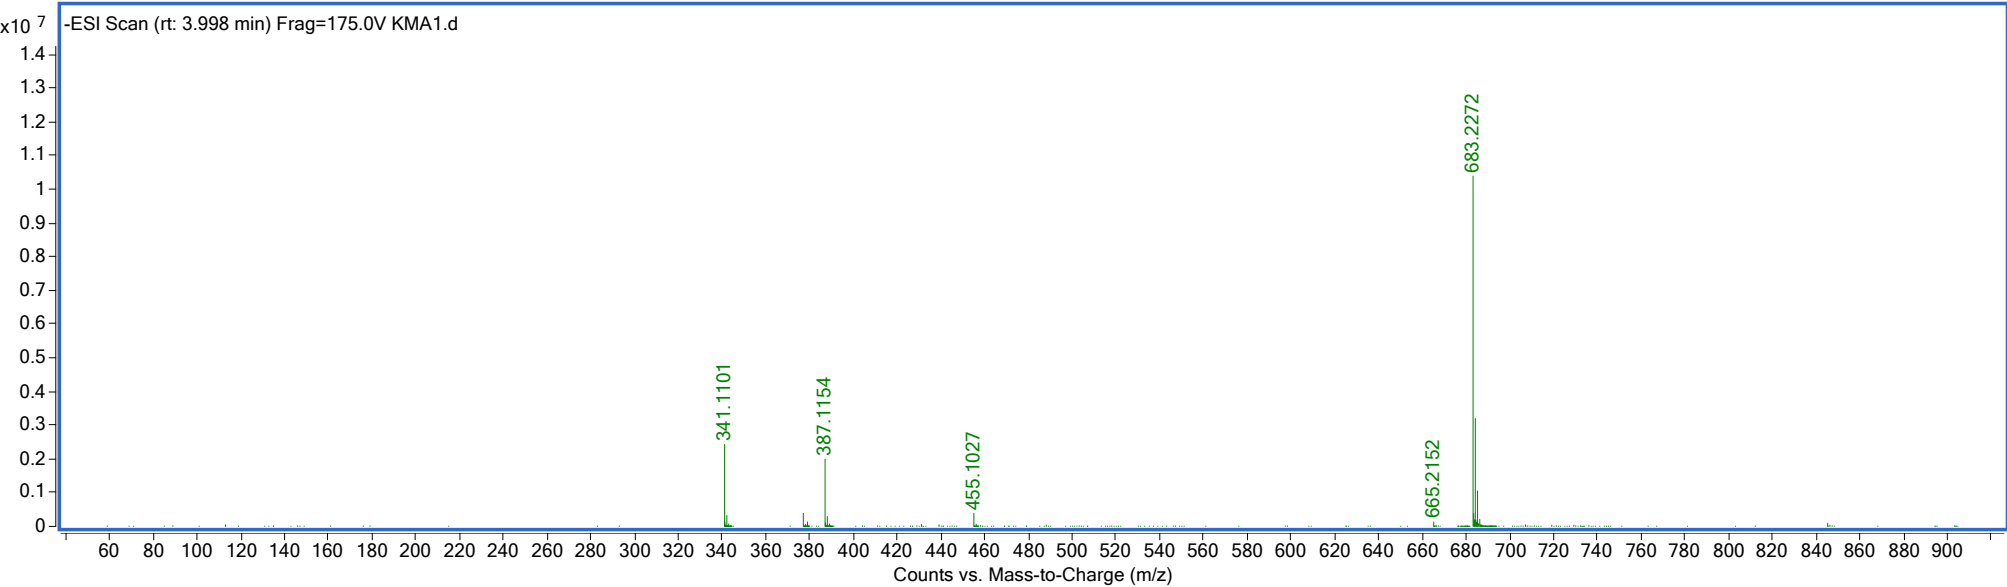

Signal 2: 5.705 min. Shikimic acid (C<sub>7</sub>H<sub>10</sub>O<sub>5</sub>)

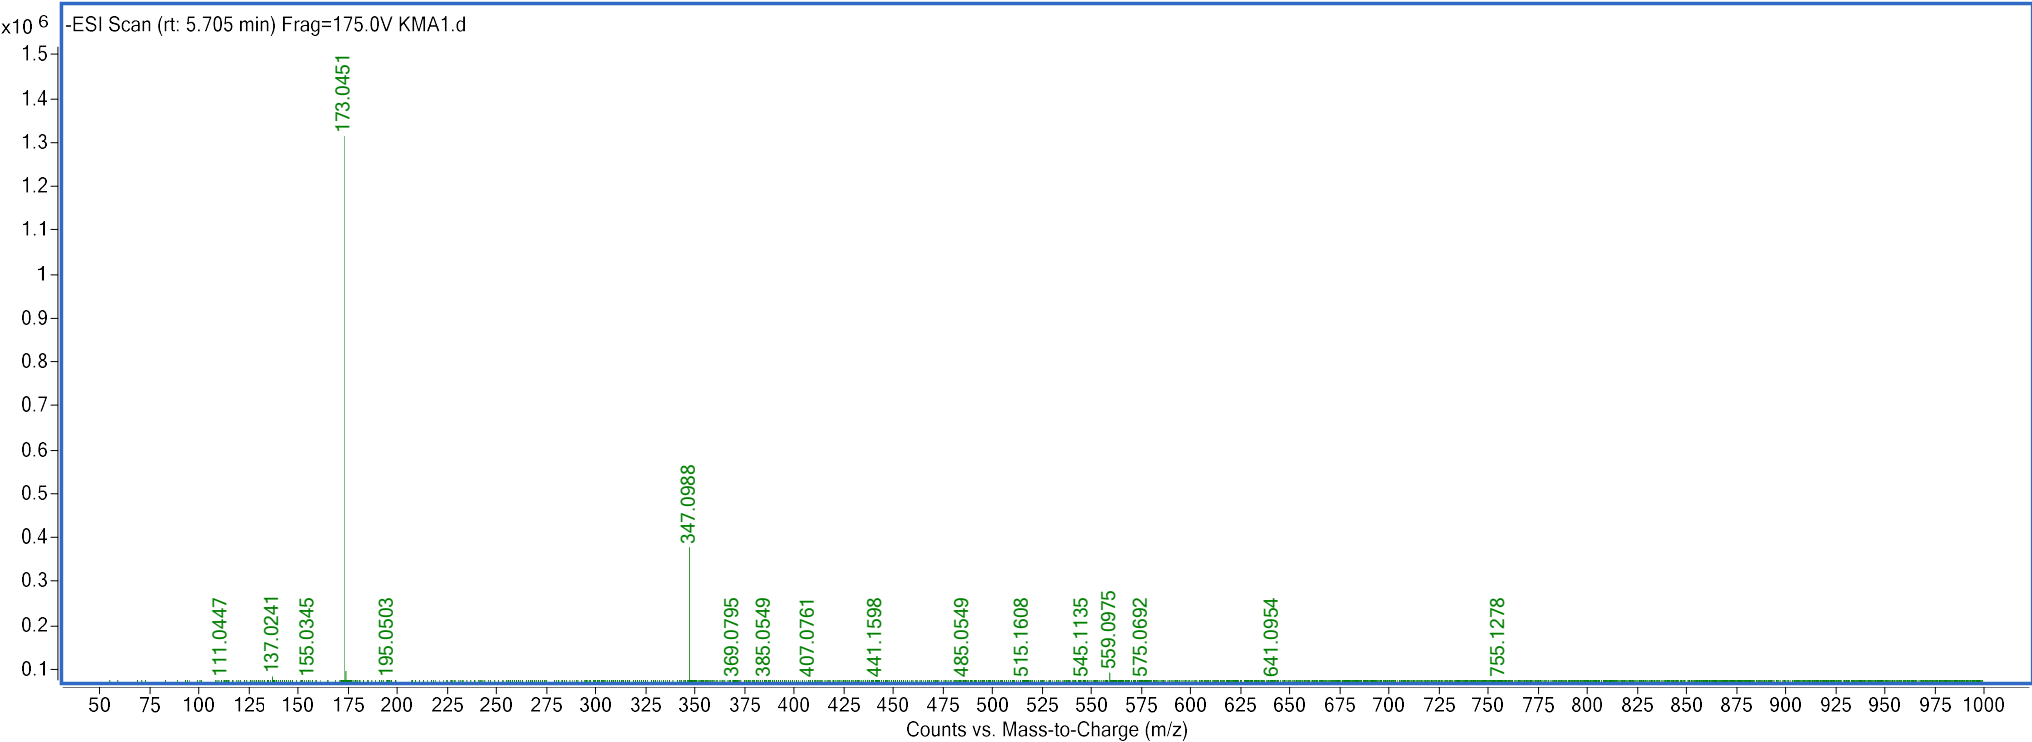

Signal 3: 6.732 min. Quinic acid (C<sub>7</sub>H<sub>12</sub>O<sub>6</sub>)

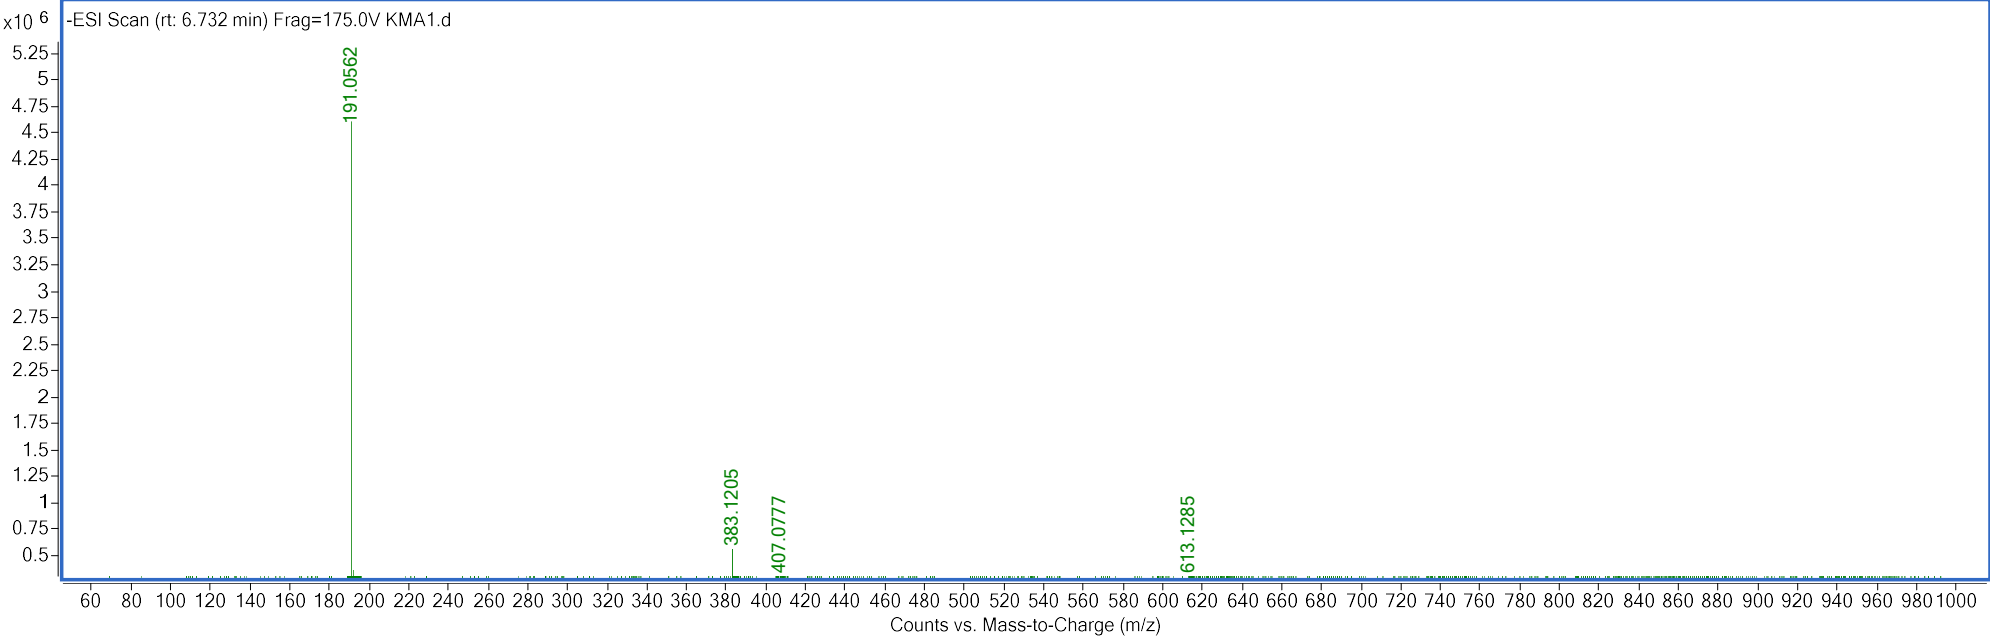

Signal 4: 13.078 min. Galloylglucose (C<sub>13</sub>H<sub>16</sub>O<sub>10</sub>)

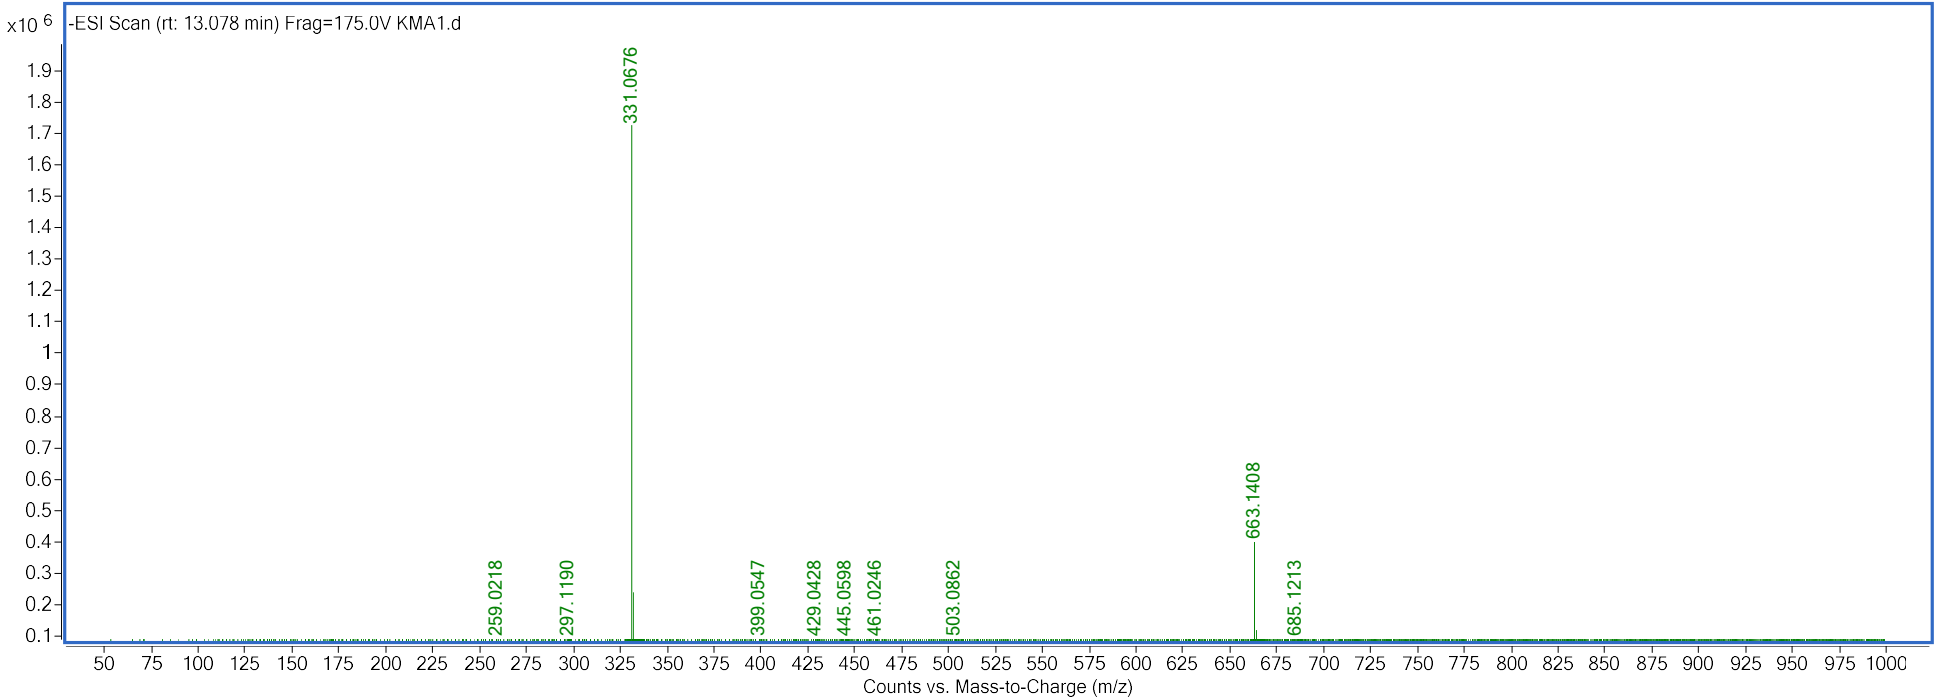

Signal 5: 17.005 min. Galloyl diglucoside (C<sub>19</sub>H<sub>26</sub>O<sub>15</sub>)

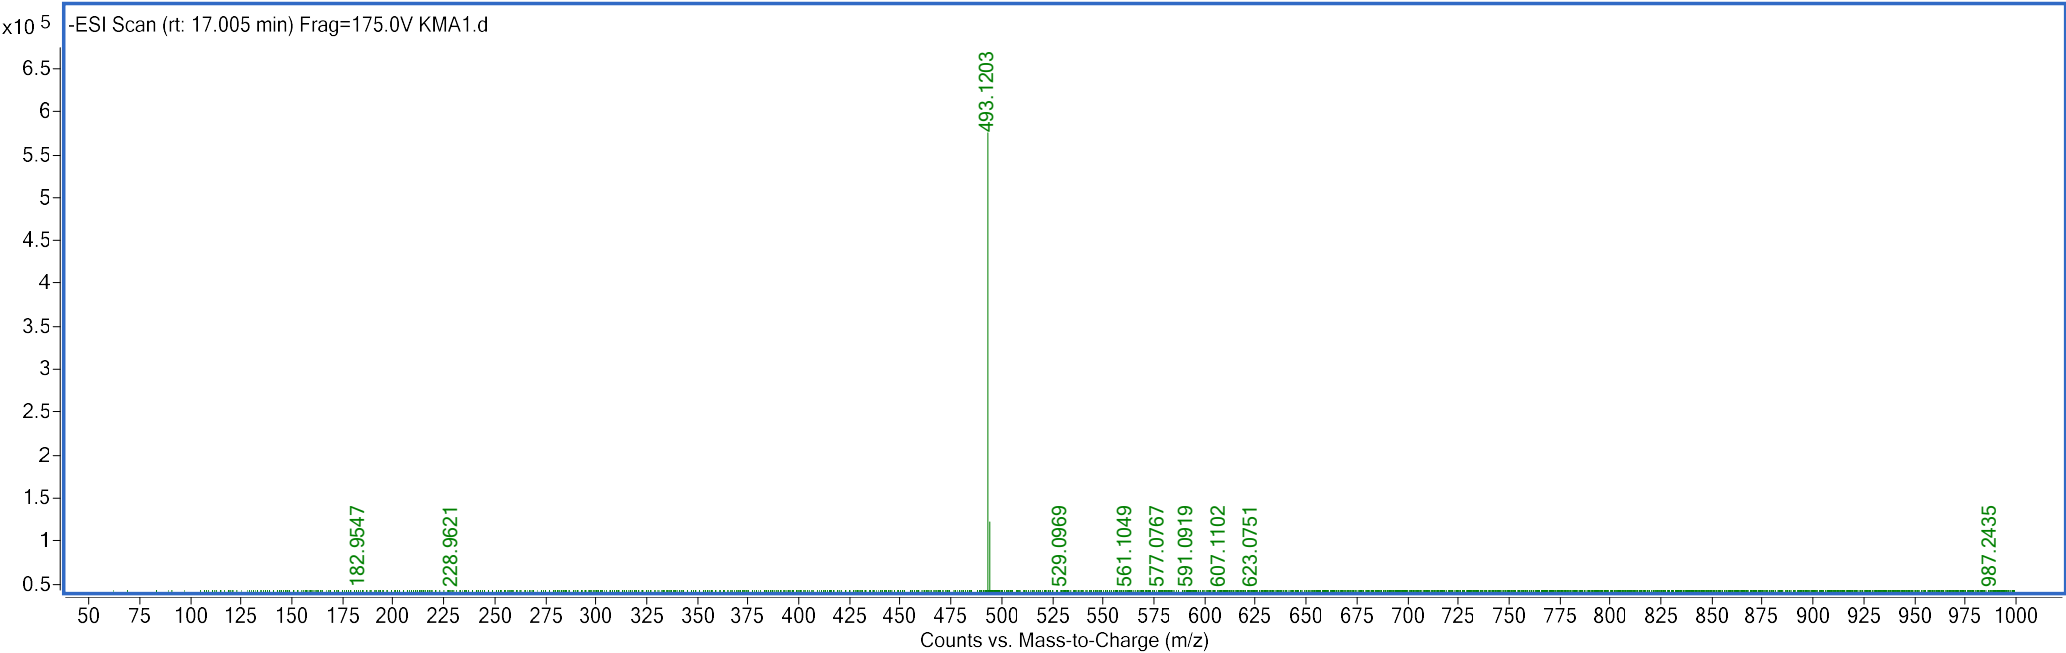

Signal 6: 19.225 min. 5-O-Galloylquinic acid (C<sub>14</sub>H<sub>16</sub>O<sub>10</sub>)

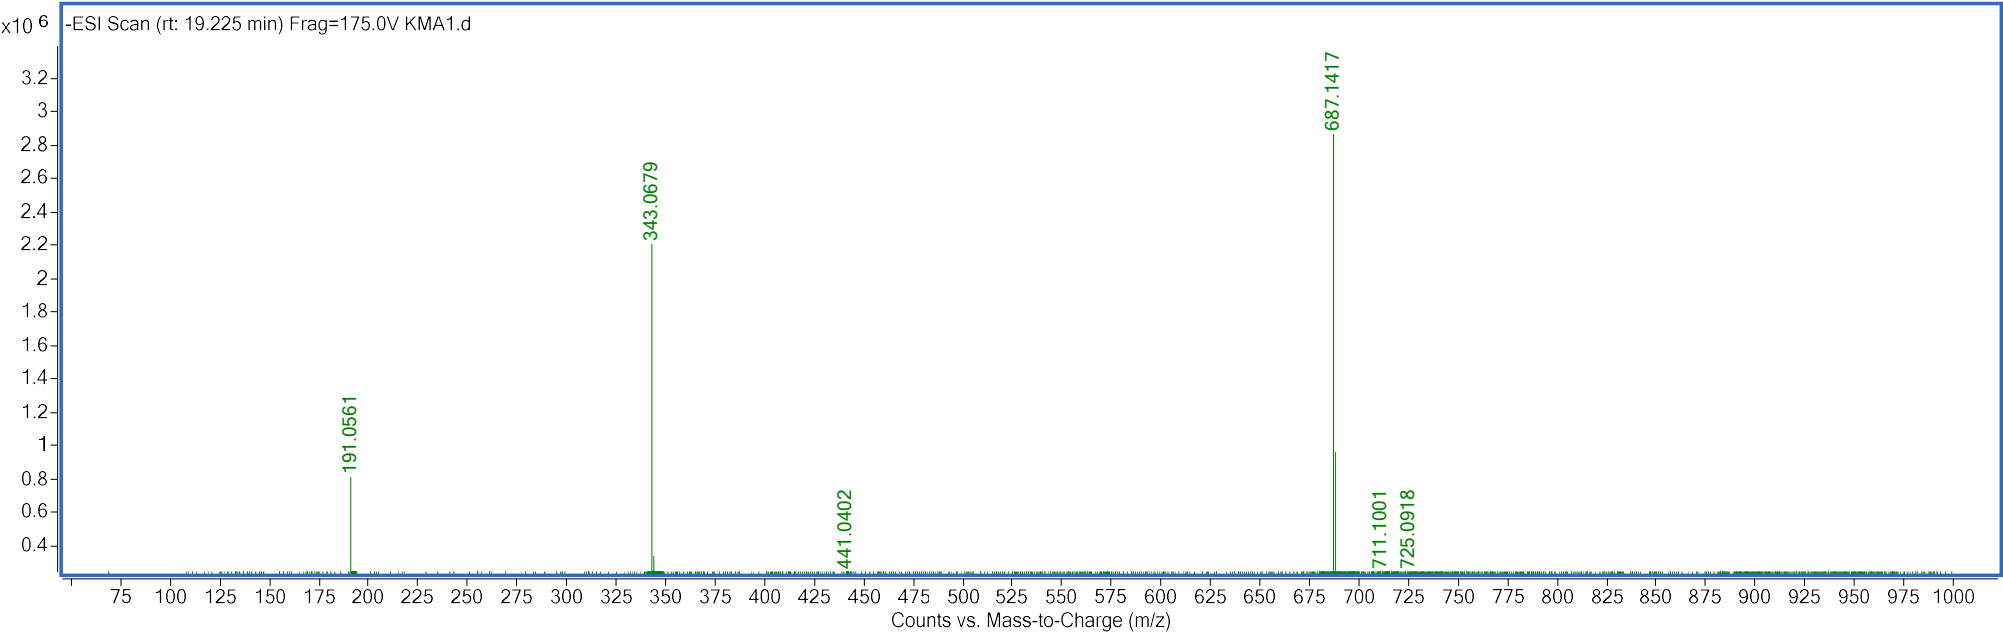

Signal 7: 23.434 min. NI

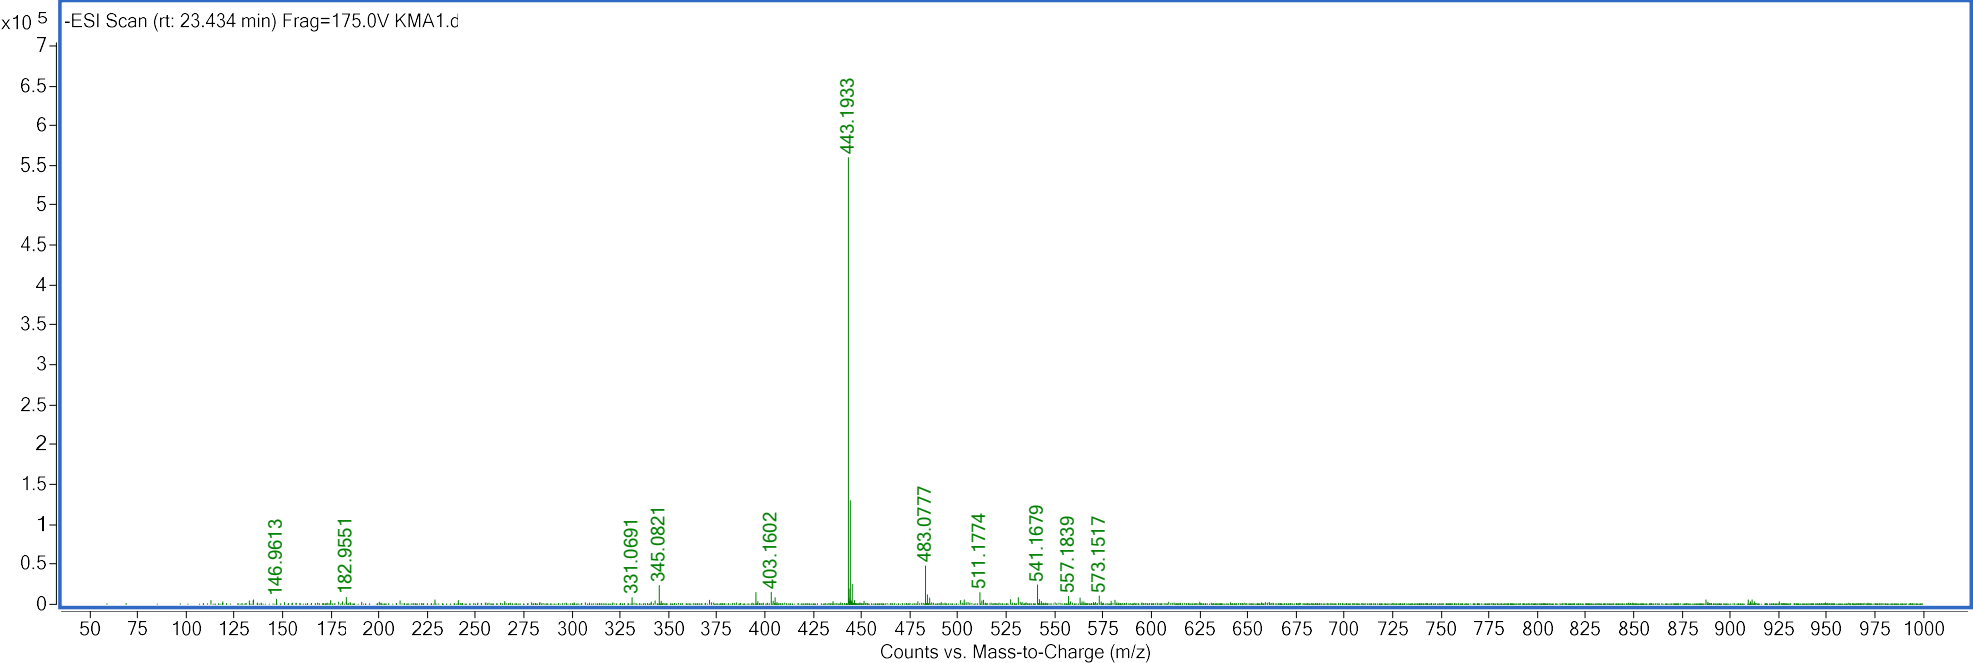

Signal 8: 26.002 min. NI

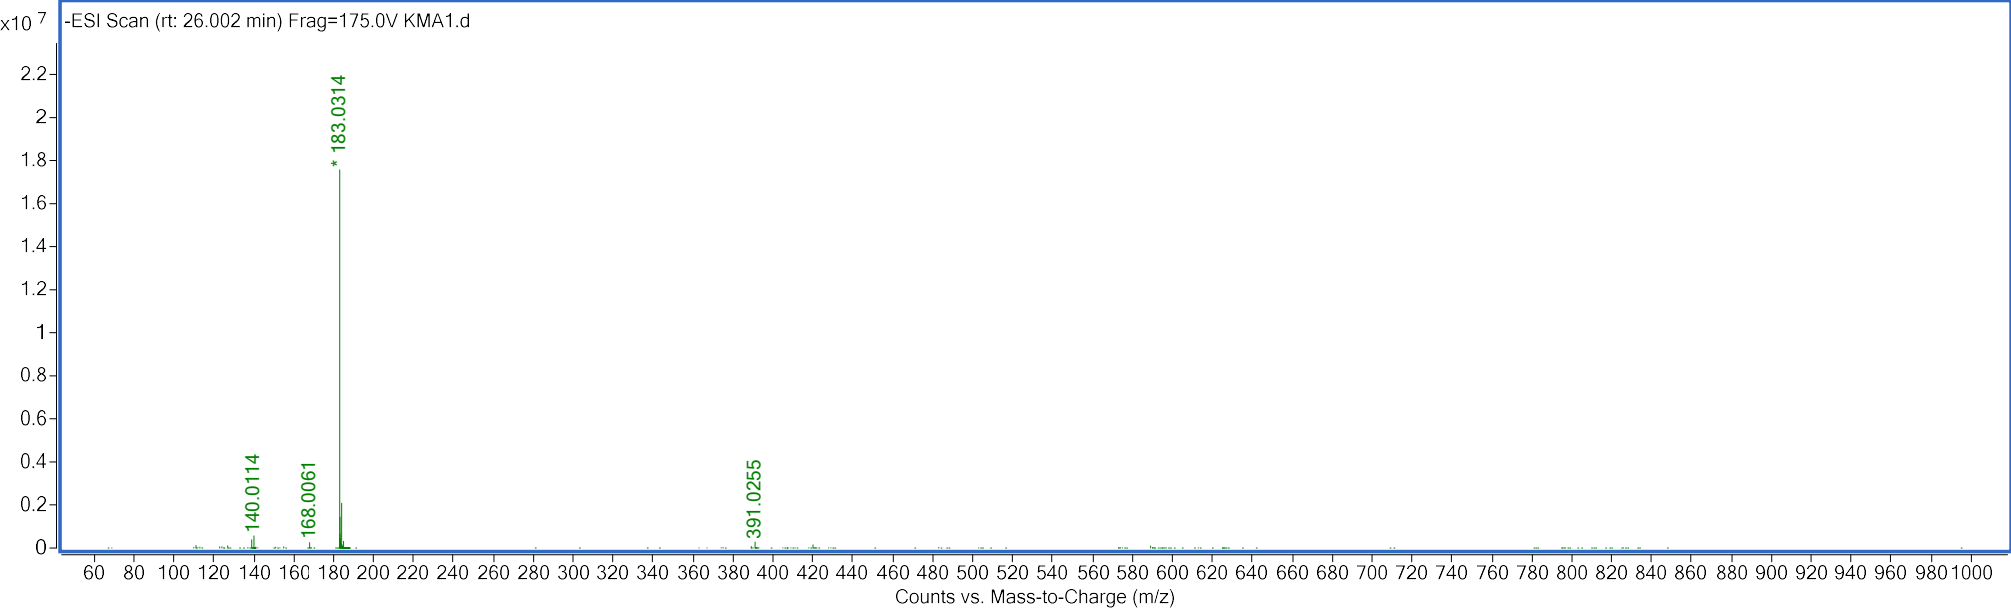



Signal 9: 27.576 min. Mangiferin (C<sub>19</sub>H<sub>18</sub>O<sub>11</sub>)

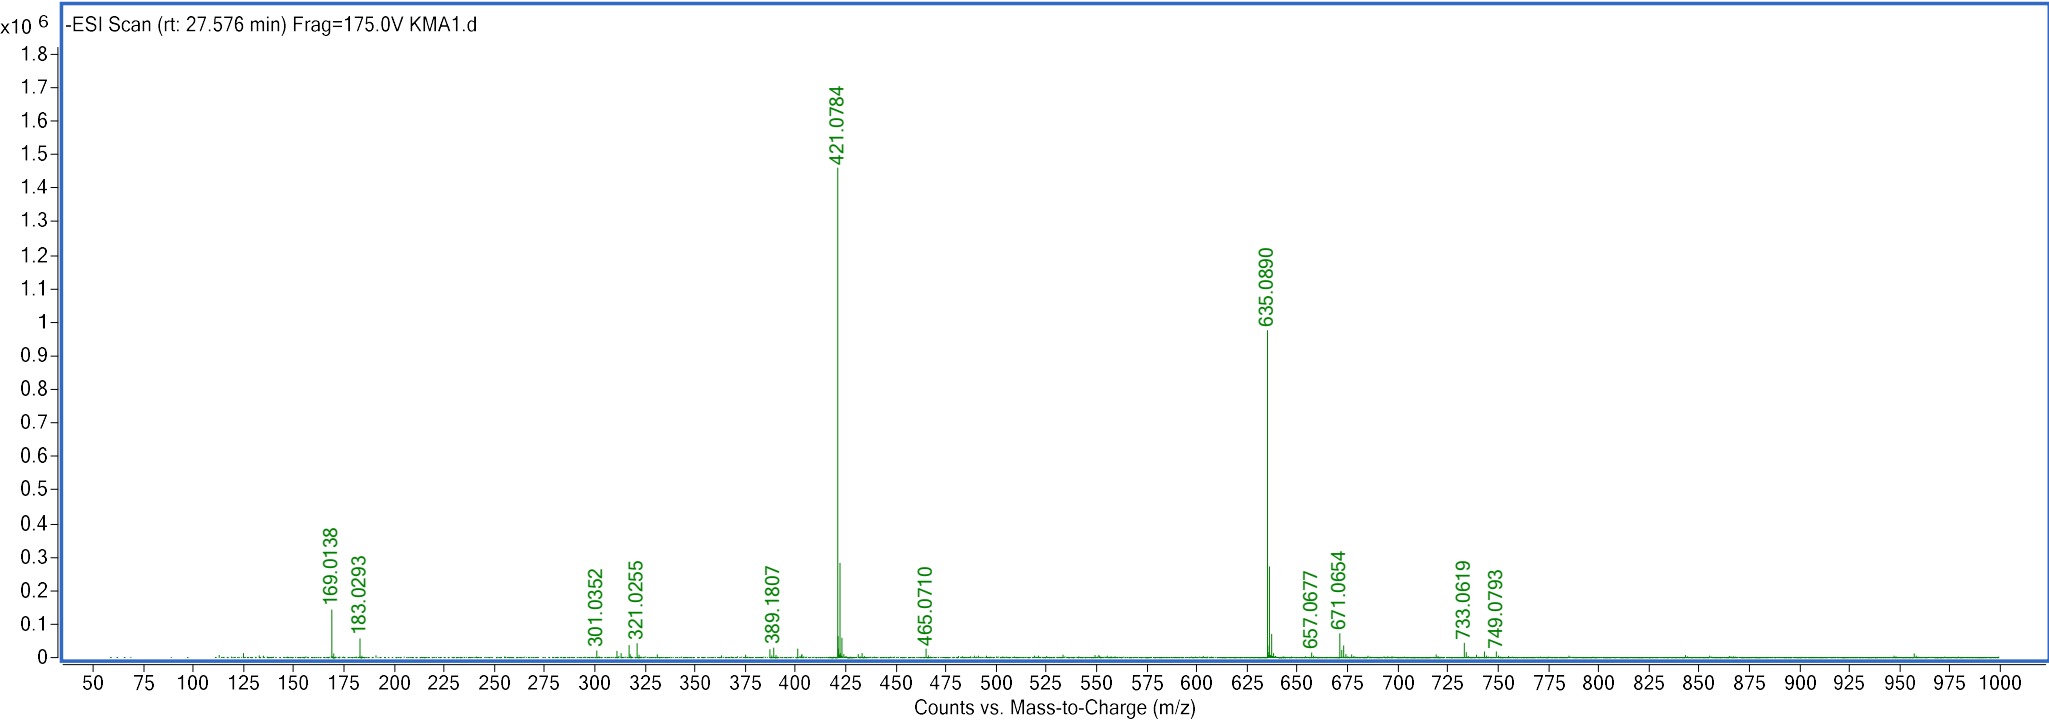

Signal 10: 28.421 min. Trigalloyl glucose Isomer I (C<sub>27</sub>H<sub>24</sub>O<sub>18</sub>)

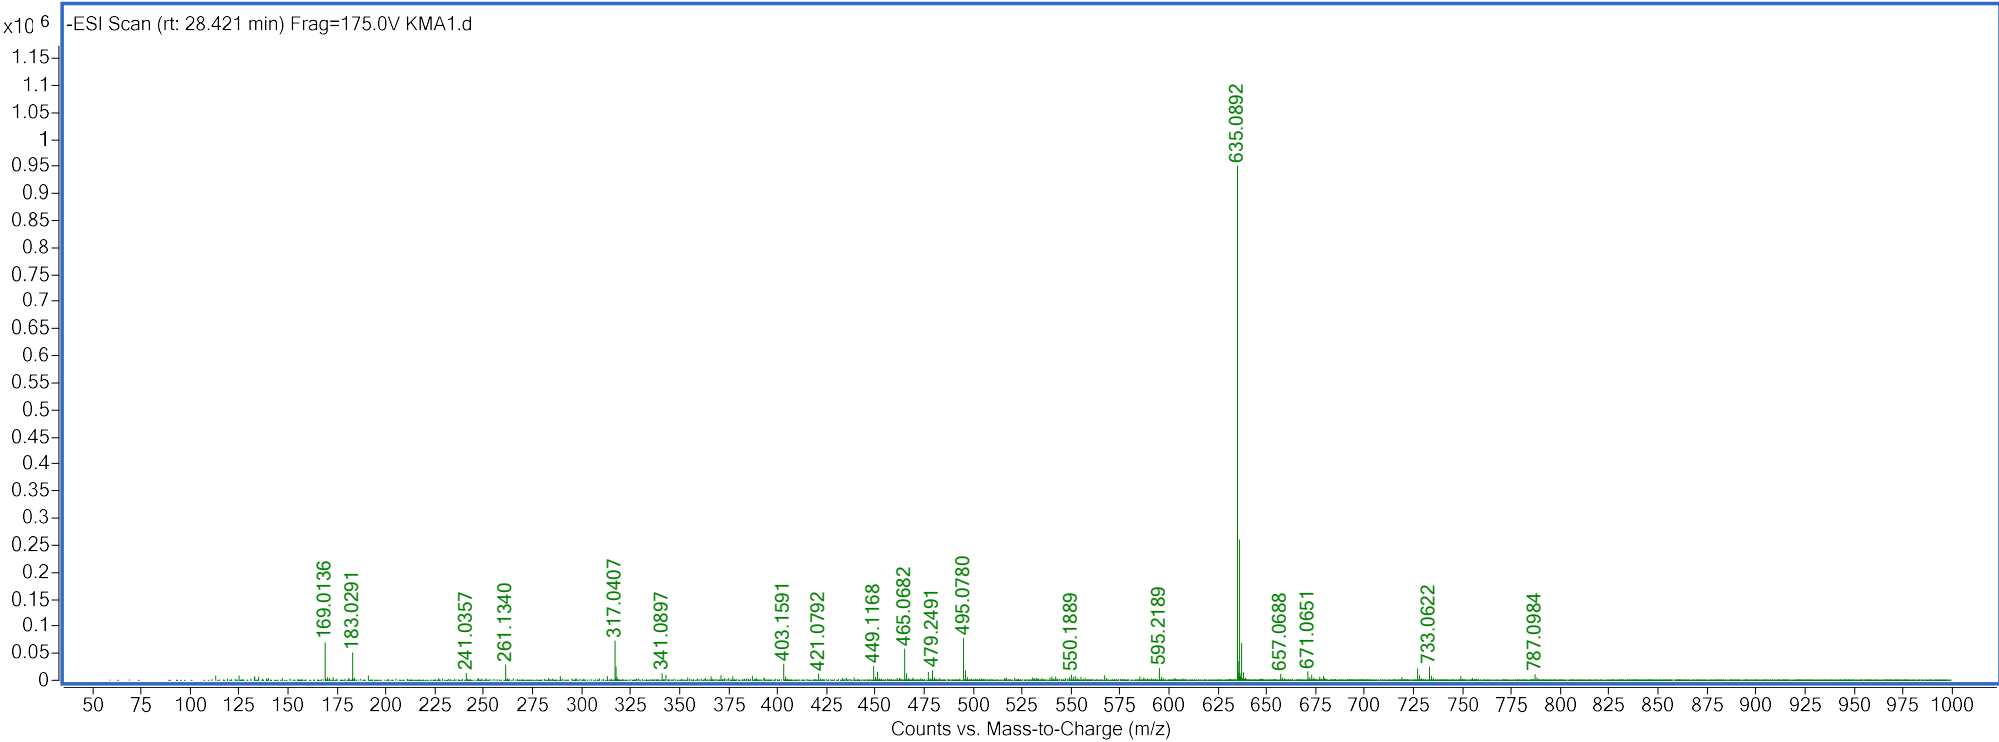

Signal 11: 28.753 min. Trigalloyl glucose Isomer II (C<sub>27</sub>H<sub>24</sub>O<sub>18</sub>)

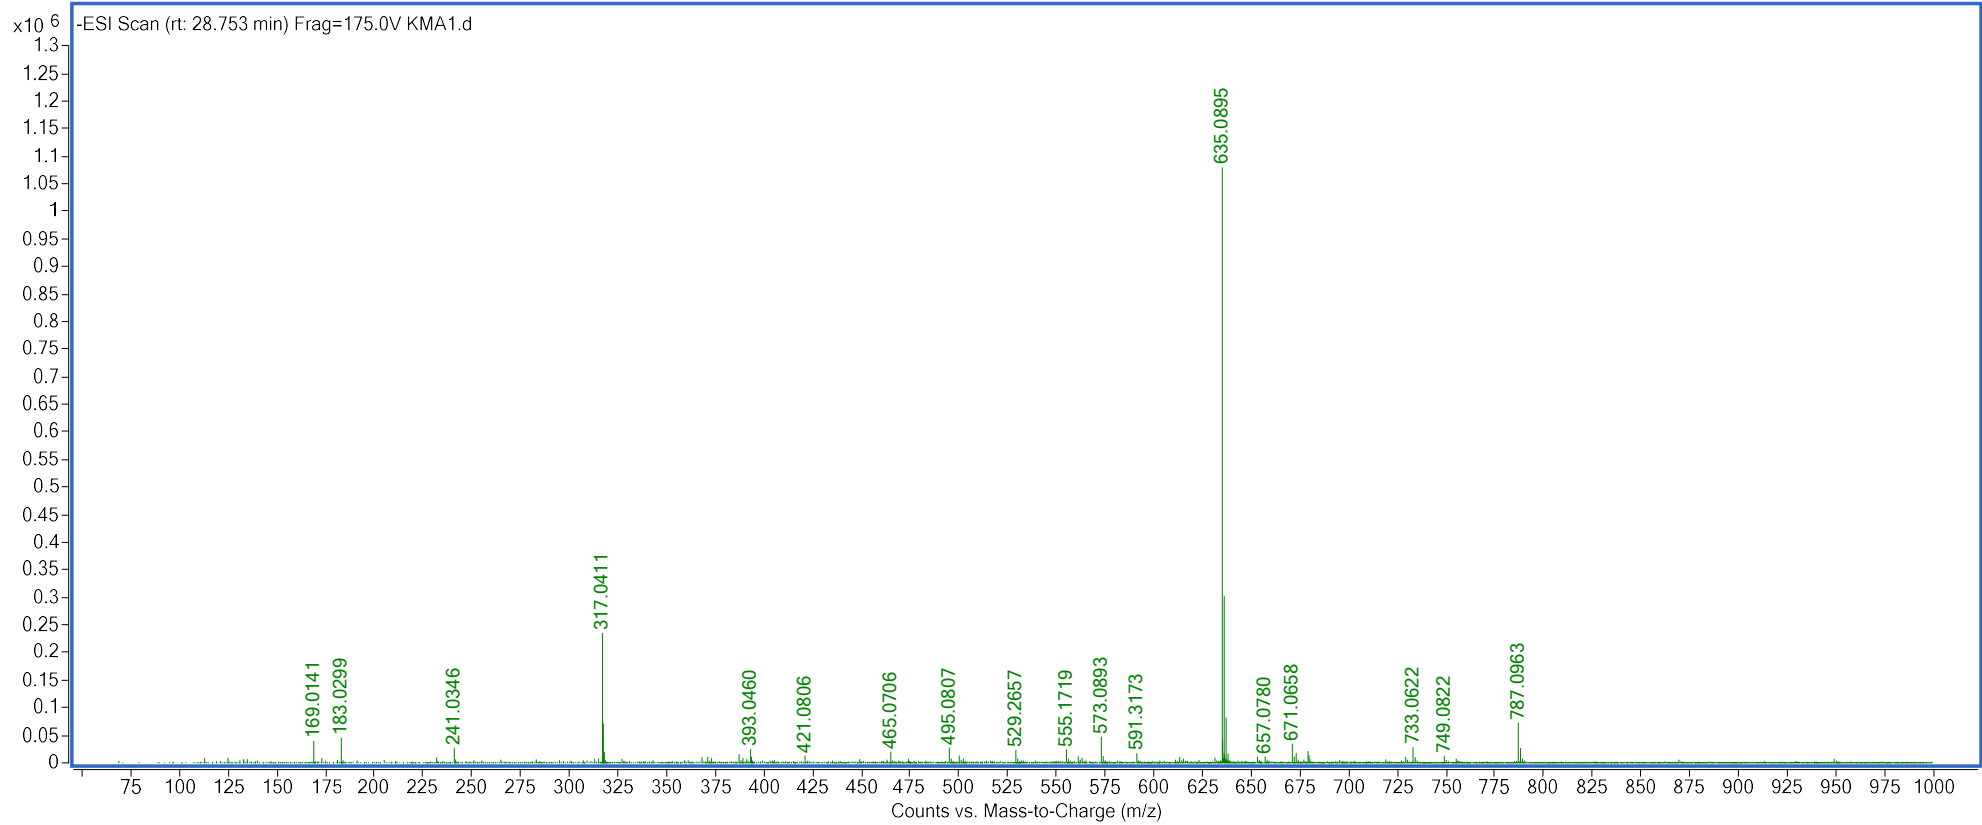

Signal 12: 29.068 min. Tetragalloyl glucose Isomer I (C<sub>34</sub>H<sub>28</sub>O<sub>22</sub>)

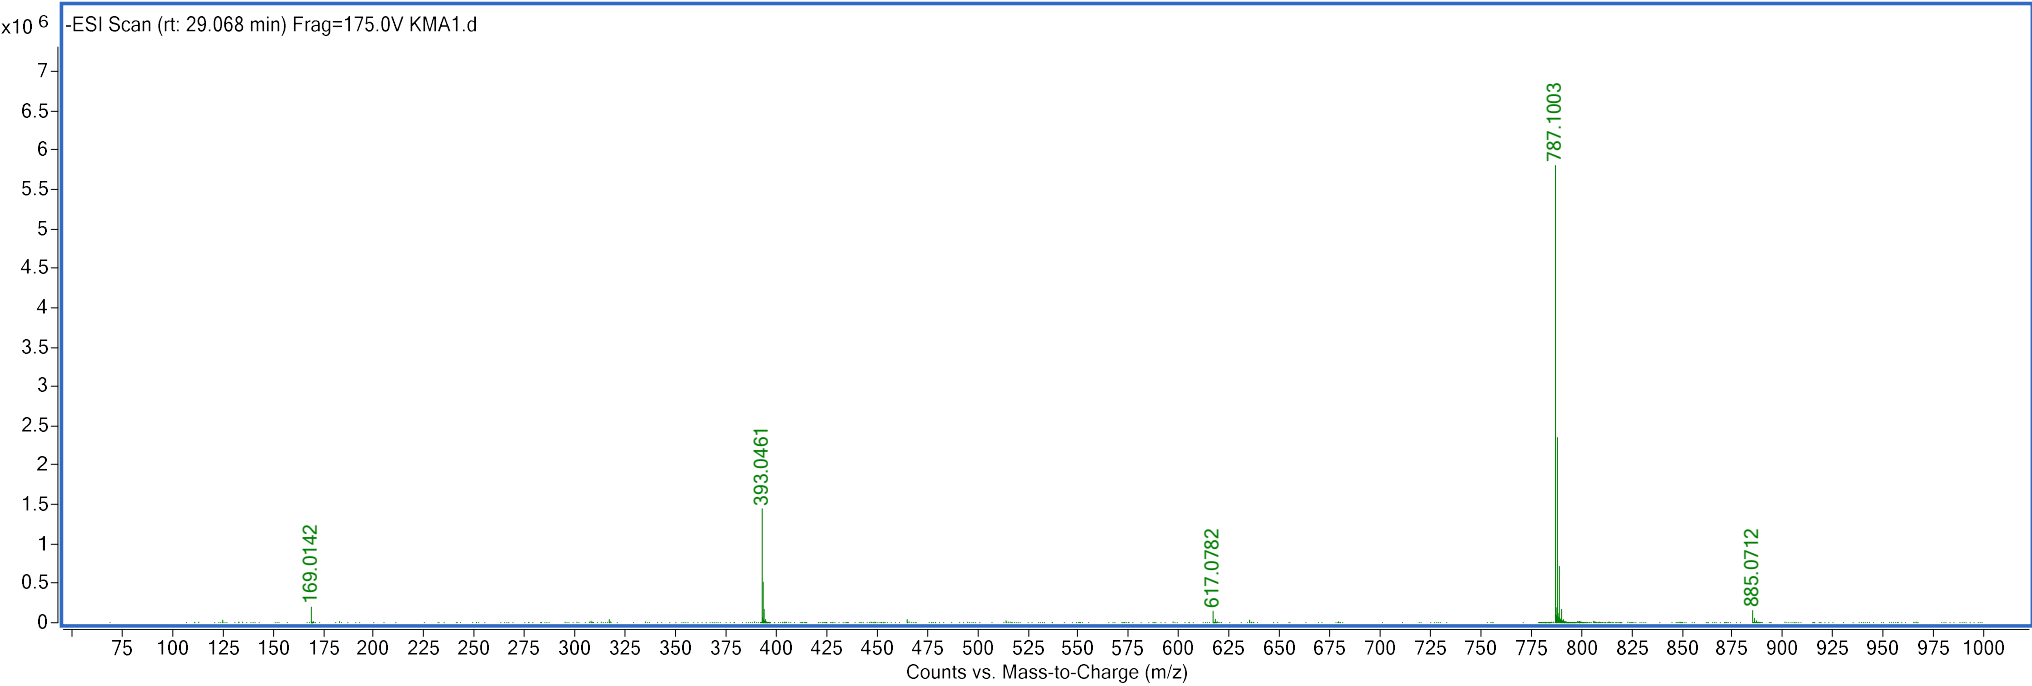

Signal 13: 29.383 min. Tetragalloyl glucose Isomer II (C<sub>34</sub>H<sub>28</sub>O<sub>22</sub>)

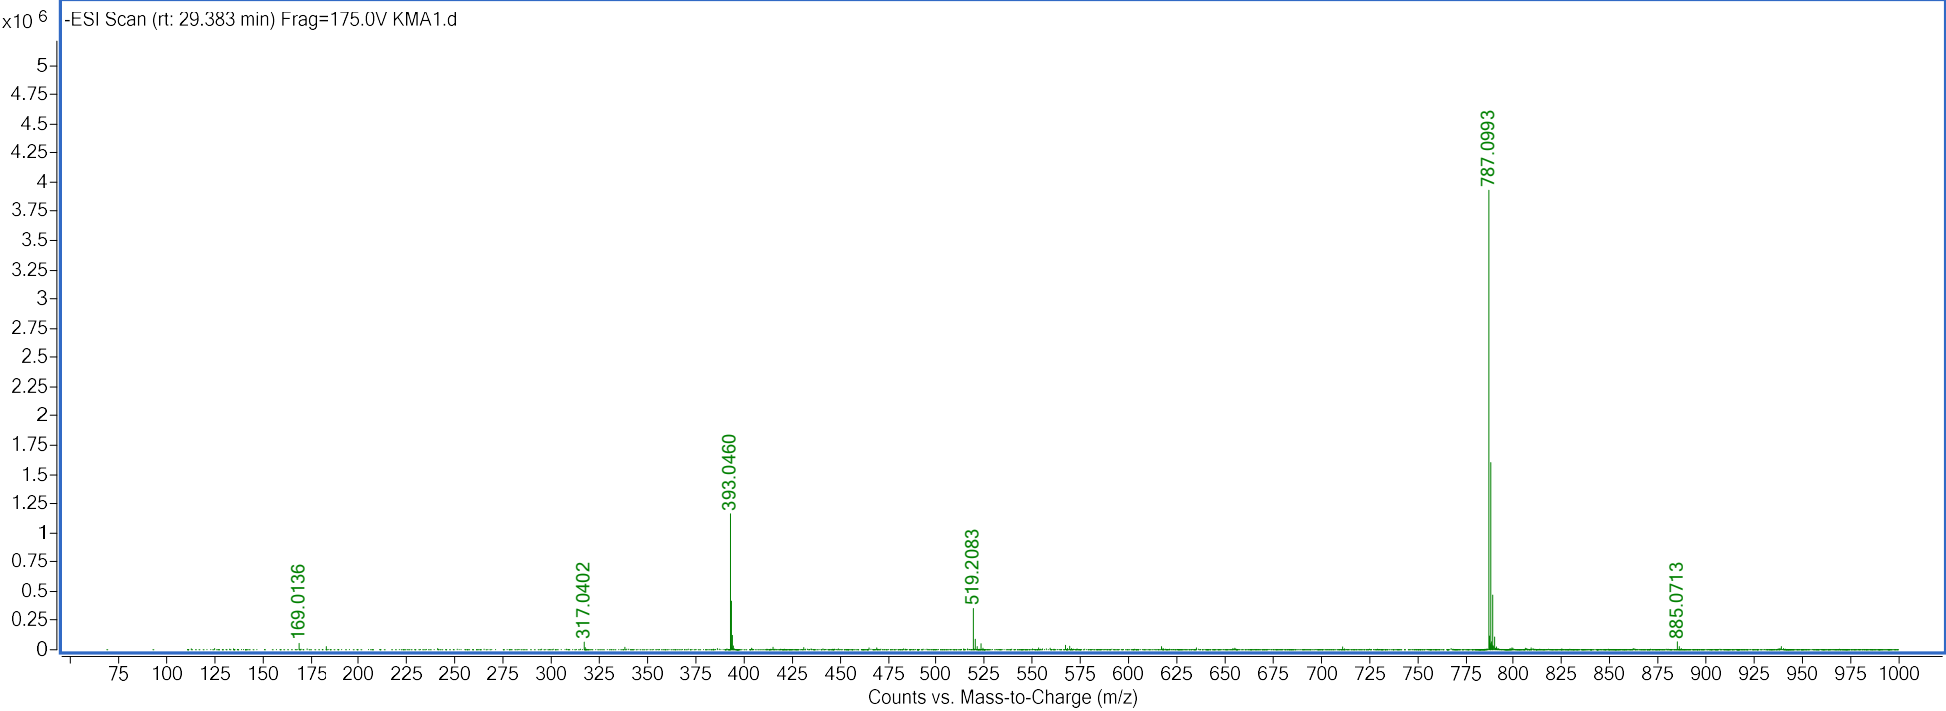

Signal 14: 29.581 min. Tetragalloyl glucose Isomer III (C<sub>34</sub>H<sub>28</sub>O<sub>22</sub>)

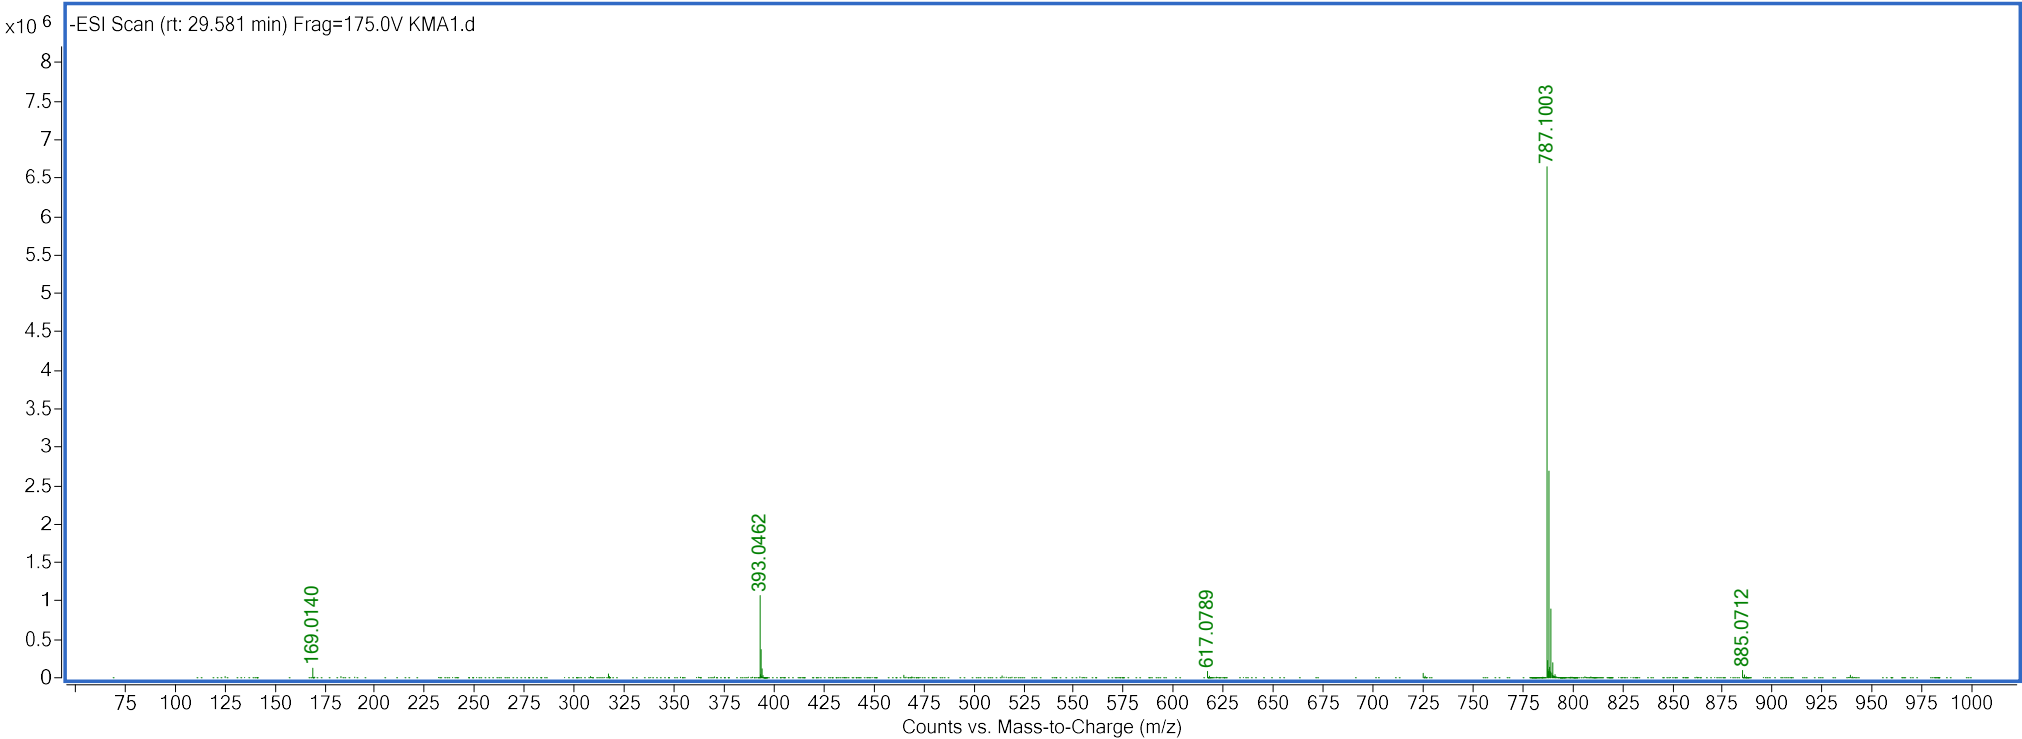

Signal 15: 29.929 min. Pentagalloyl glucose (C<sub>41</sub>H<sub>32</sub>O<sub>26</sub>)

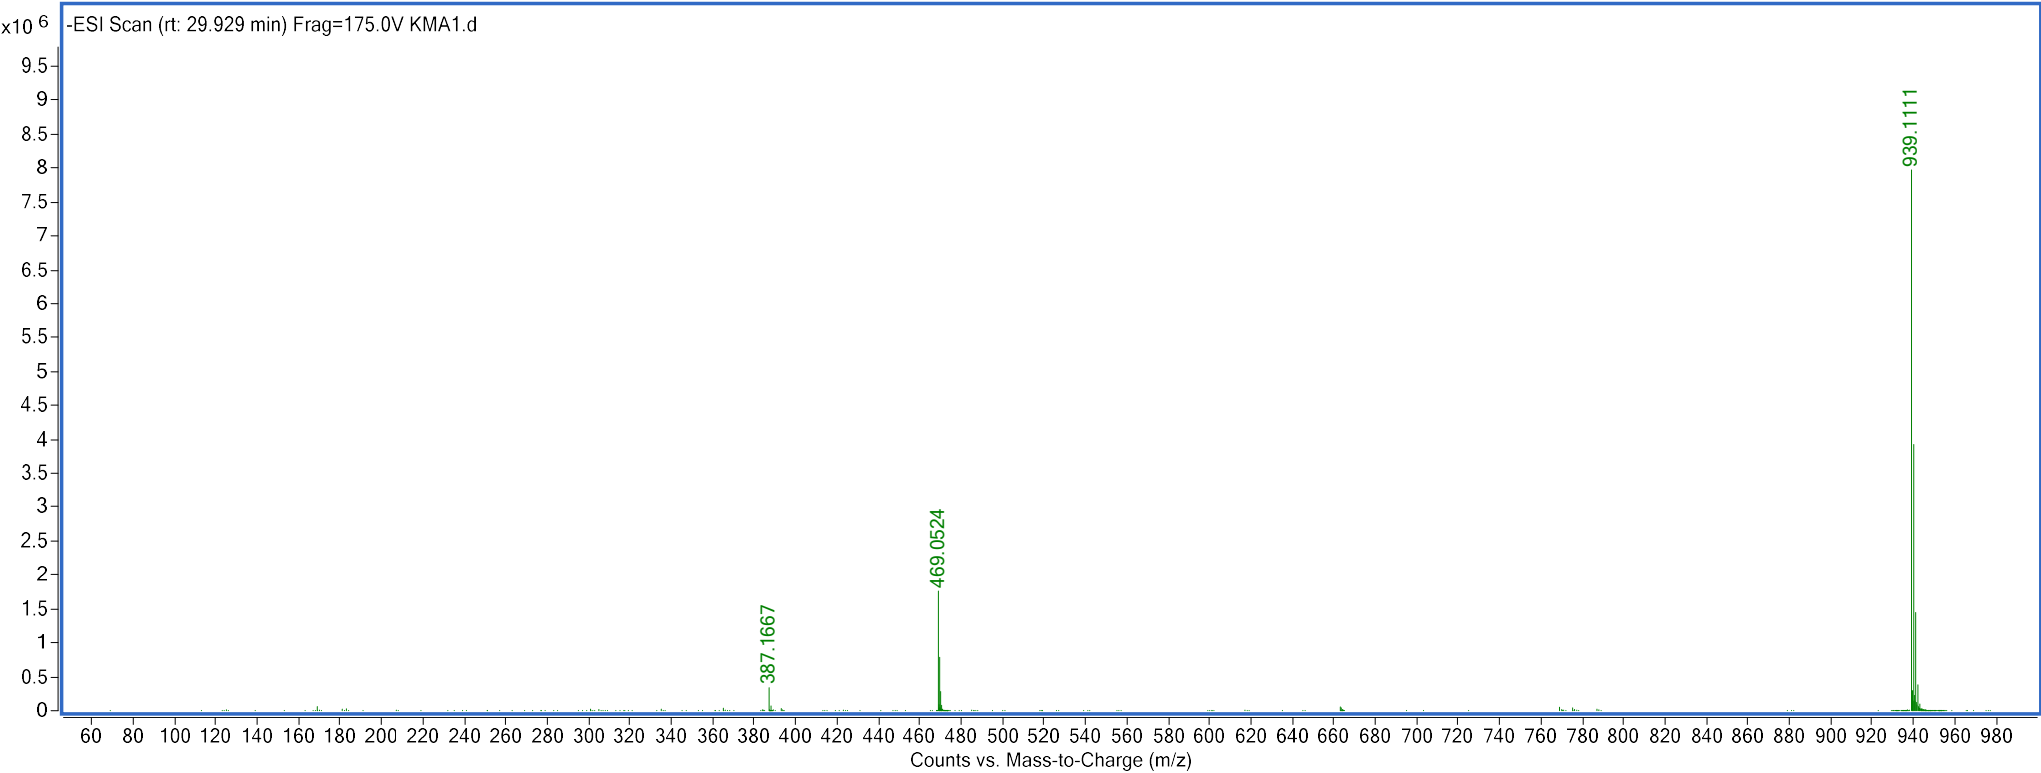

Signal 16: 30.675 min. Methyl-digallate ester (C<sub>15</sub>H<sub>12</sub>O<sub>9</sub>)

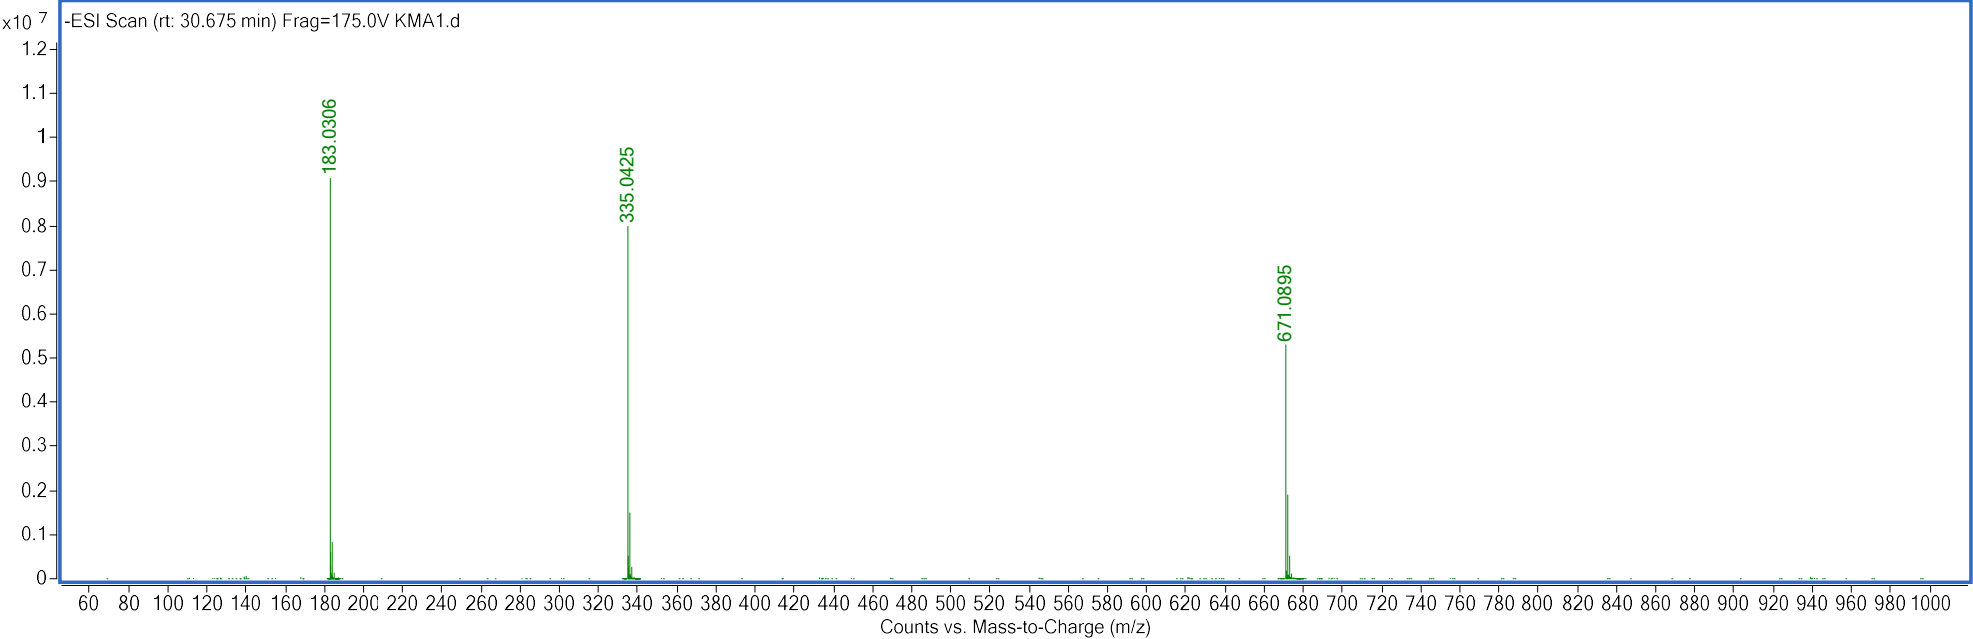



Signal 17: 31.172 min. NI (C<sub>41</sub>H<sub>32</sub>O<sub>24</sub>)

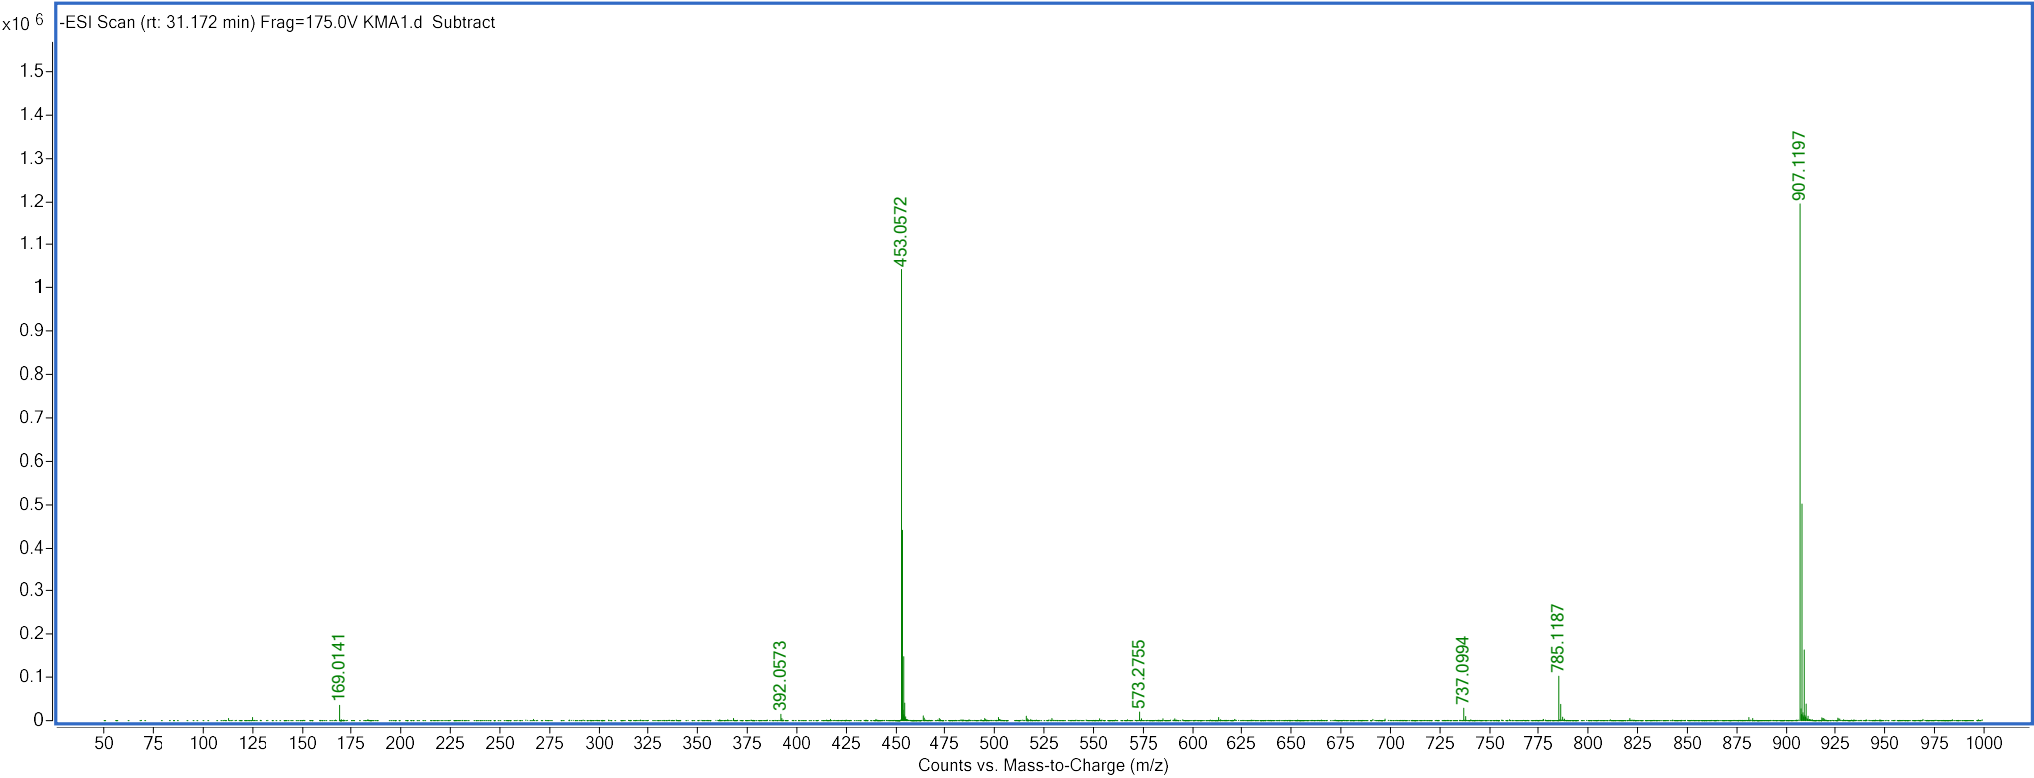

Signal 18: 33.094 min. NI

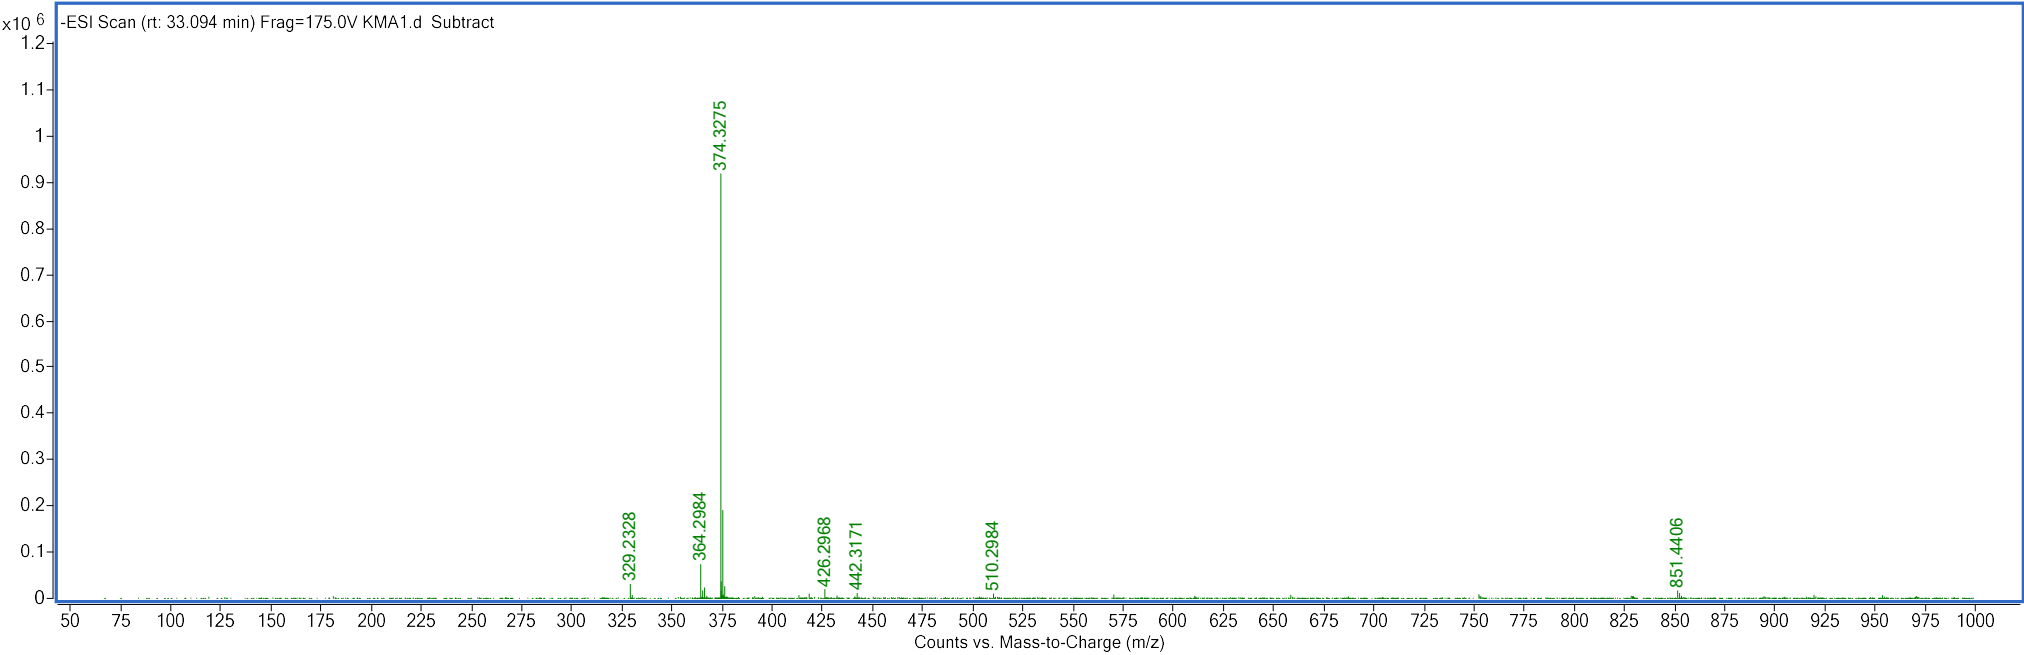

Signal 19: 33.889 min. NI

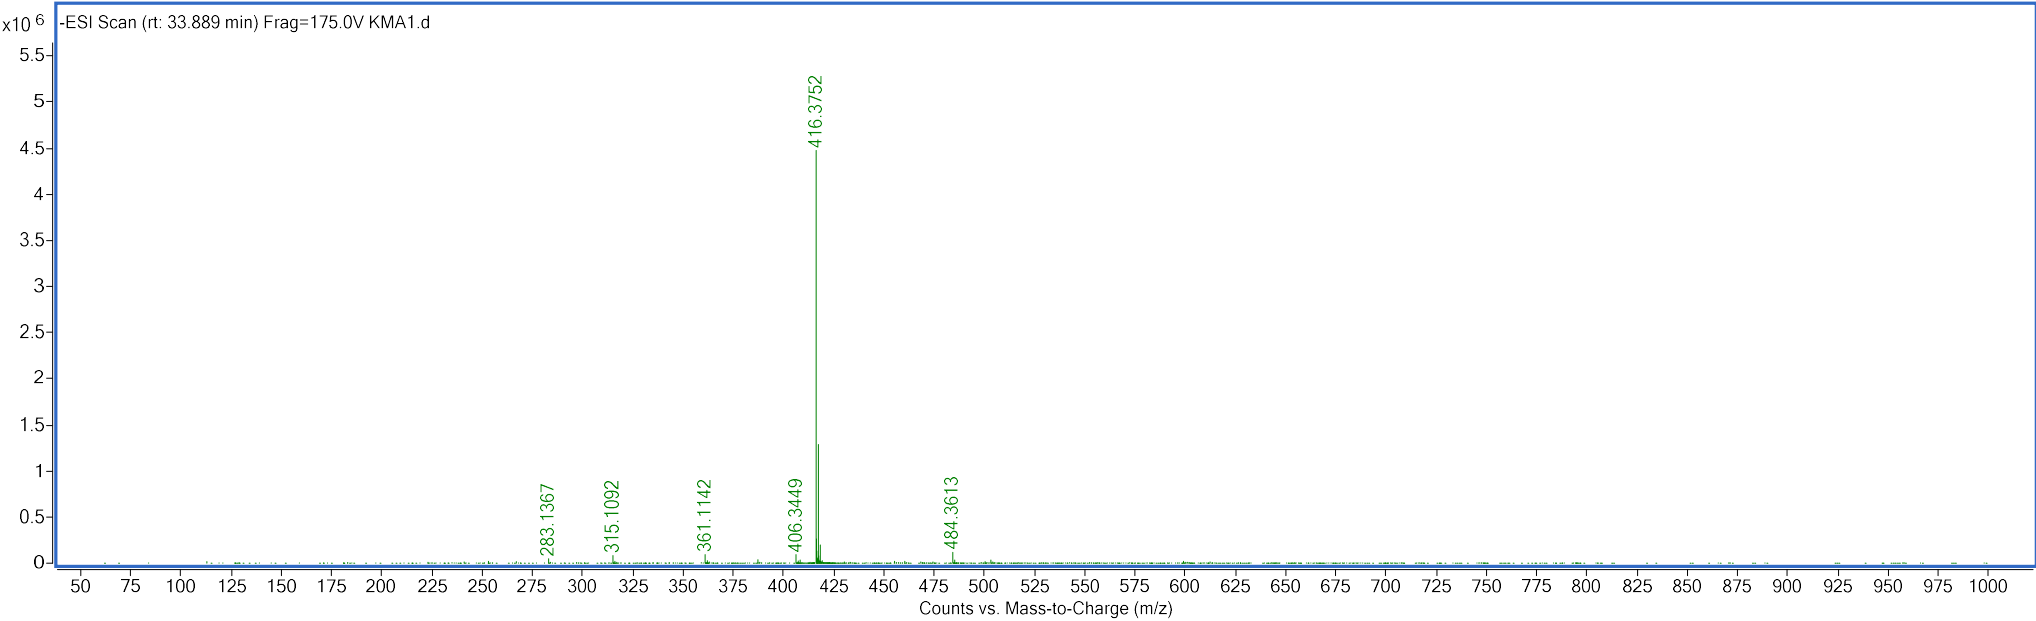

Signal 20: 46.863 min. Anacardic acid (C<sub>22</sub>H<sub>32</sub>O<sub>3</sub>)

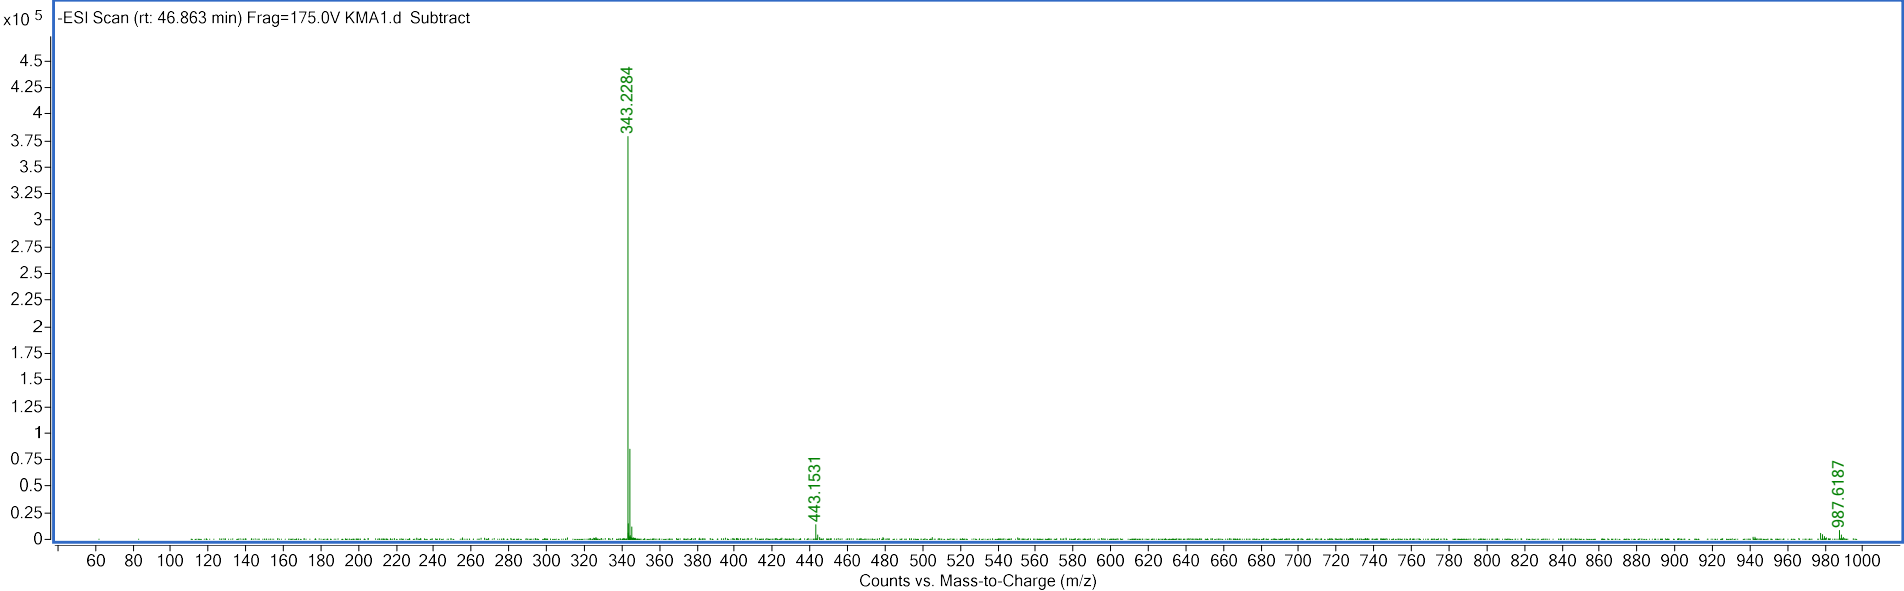

Signal 21: 48.504 min. Ginkgoic acid (C<sub>22</sub>H<sub>34</sub>O<sub>3</sub>)

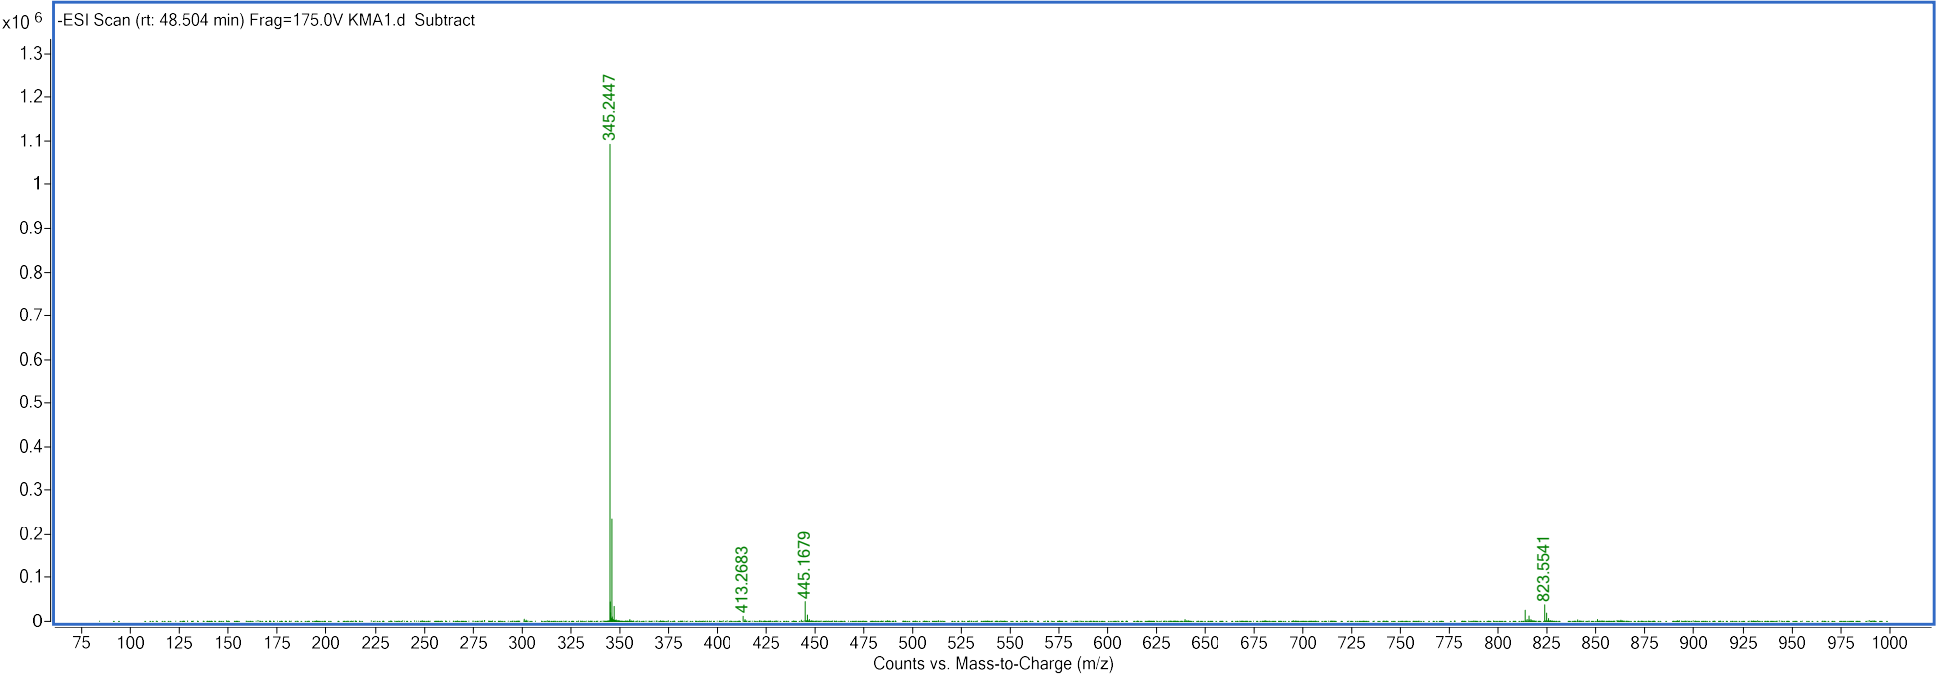

Signal 22: 49.001 min. NI(C<sub>24</sub>H<sub>36</sub>O<sub>3</sub>)

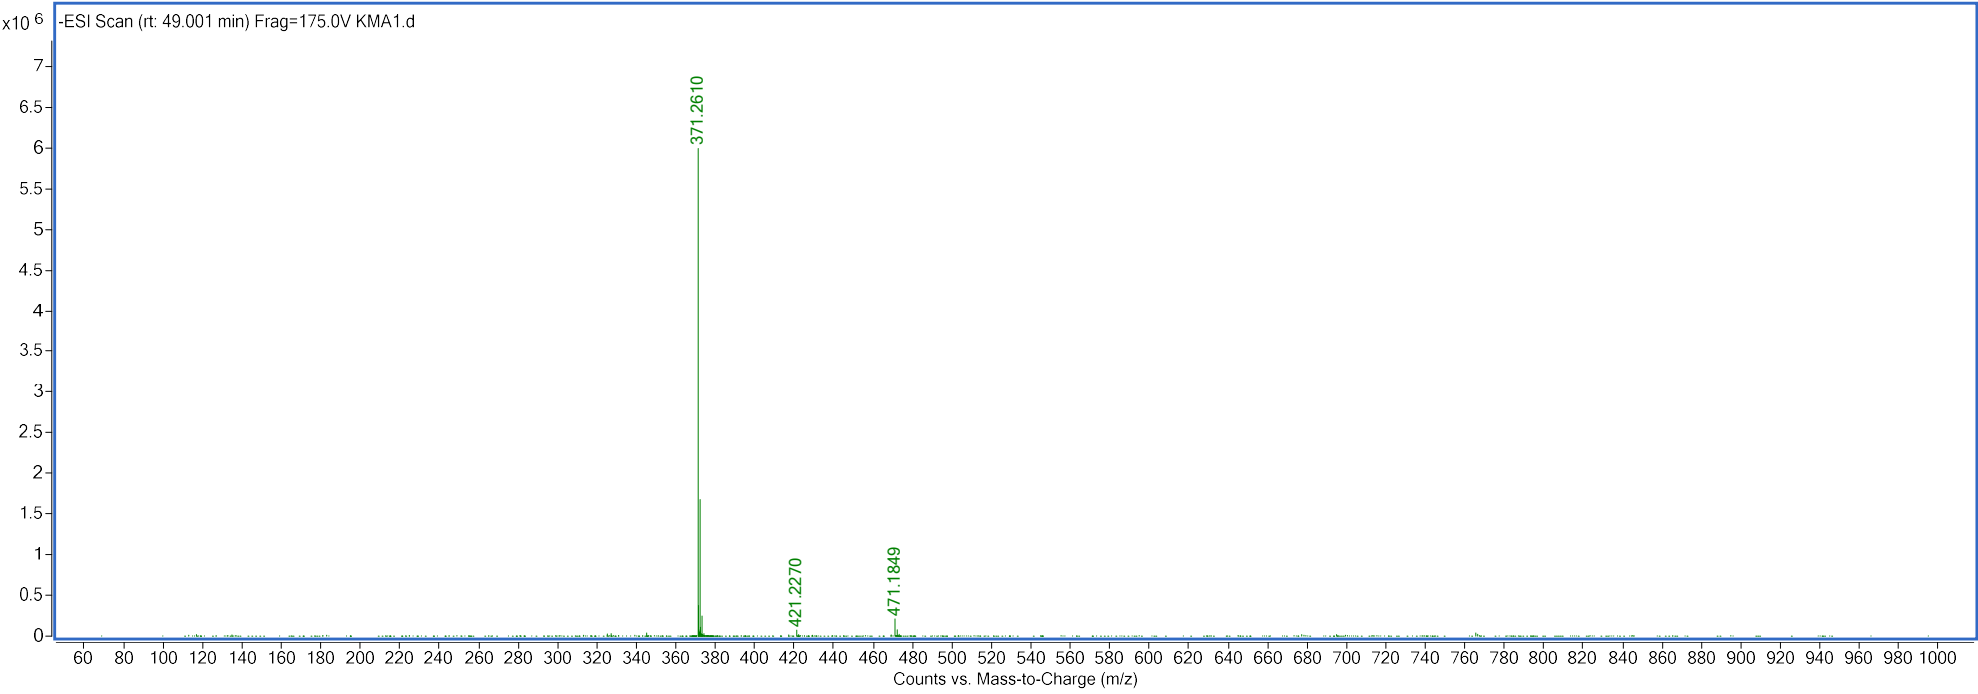

Supplement: s1 [file s1]
