# Supplementary material for: Bioactive Phenolic Compounds from the Agroindustrial Waste of Colombian Mango Cultivars ‘Sugar Mango’ and ‘Tommy Atkins’—An Alternative for Their Use and Valorization
Source: MDPI journal article supplement (doi:10.3390/antiox8020041), 2019-02-15

**Figure S1.** Cell line sensitivity against Taxol®. A-549 (lung adenocarcinoma), HT-29 (colorectal adenocarcinoma), MDA-MB-231 (breast adenocarcinoma) and PC-3 (prostate cancer).

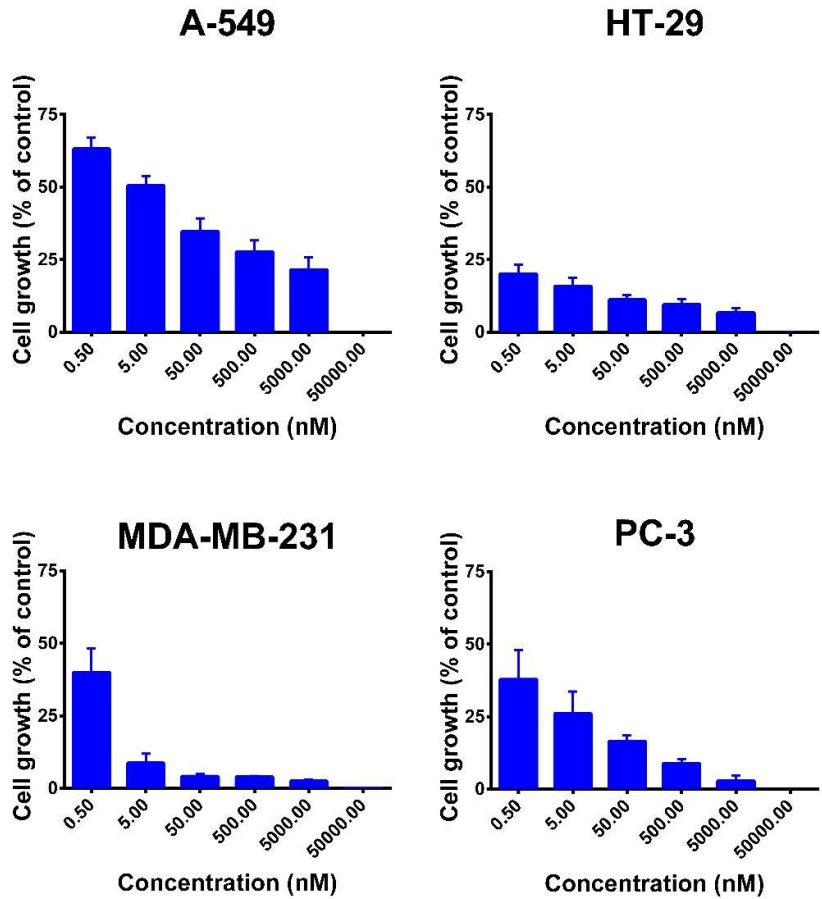

Supplement: s1 [file s1]
