# Supplementary figures and images for: Bioactive Phenolic Compounds from the Agroindustrial Waste of Colombian Mango Cultivars ‘Sugar Mango’ and ‘Tommy Atkins’—An Alternative for Their Use and Valorization
Source: MDPI journal article supplement (doi:10.3390/antiox8020041), 2019-02-15

Figure S2. Chromatographic profile of SKS extract obtained by HPLC-ESI-MS(Q-TOF)

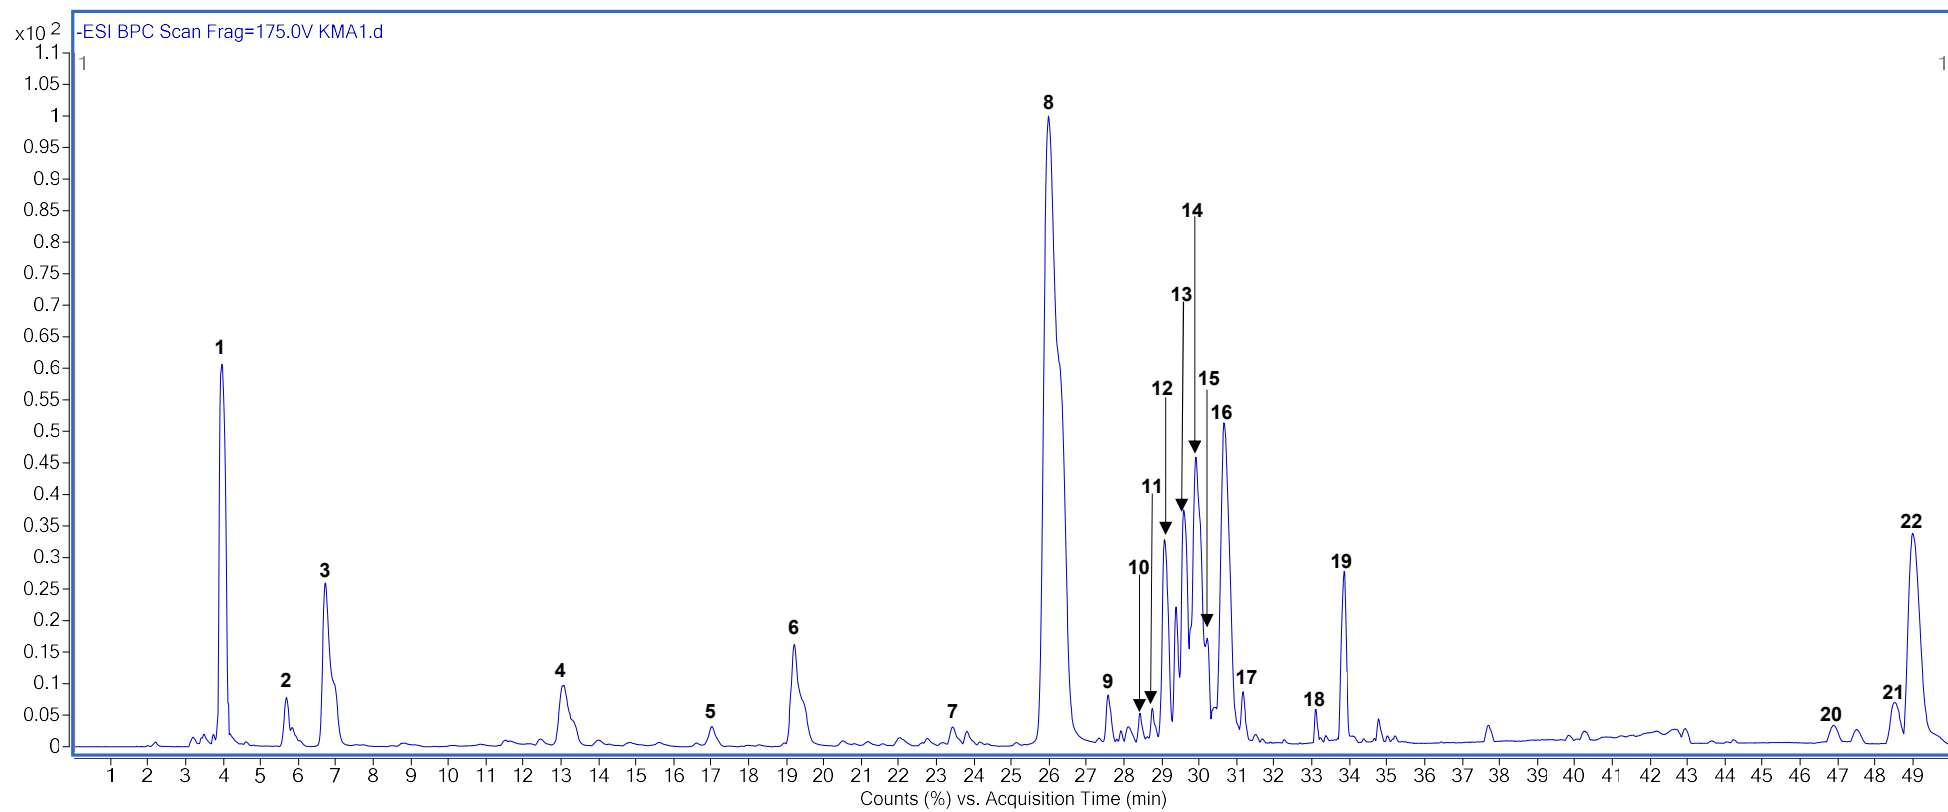

Supplement: s1 [file s1]
